# Supplementary material
Source: PubMed Central journal article supplement (PMC3530164)
Supplement: NIHMS423735-supplement-02.pdf [file NIHMS423735-supplement-02.pdf]

**Table S1** Total uniquely-aligned reads in each experiment. Related to Figures 1 and 2/

|                          | Total uniquely-aligned reads |
|--------------------------|------------------------------|
| Nucleosomes in ES cells  | 144,096,430                  |
| Nucleosomes in EHP cells | 159,789,065                  |
| Foxa2 in EHP cells       | 37,112,674                   |
| H2A.Z in ES cells        | 44,192,818                   |
| H2A.X in ES cells        | 16,627,471                   |
| H2A.Z in EHP cells       | 37,426,202                   |
| Foxa2 in pEHP cells      | 41,314,604                   |
| H2A.Z in pEHP cells      | 47,870,376                   |
